# Supplementary material for: Experimental Infection of Sand Flies by Massilia Virus and Viral Transmission by Co-Feeding on Sugar Meal
Source: MDPI journal article supplement (doi:10.3390/v11040332), 2019-04-09
Supplement: s1 [file s1]

**S1 Table. *Phlebotomus perniciosus* L1 infected with larval food (2 doses at D0 and D2)**

| Developmental stage | Sampling day | Nb positive / tested / % |
|---------------------|--------------|--------------------------|
| Pre exposure        | D0           | 0/20                     |
| larvae              | D2           | 0/20                     |
| larvae              | D5 / D3      | <b>6/18/33.3%</b>        |
| larvae              | D12 / D9     | 0/20                     |
| larvae              | D19 / D16    | 0/20                     |
| pupae               | D26 / D23    | <b>1/20/5%</b>           |
| emerged adults      | D33 / D30    | 0/17/0                   |
| emerged adults      | D35 / D32    | <b>1/29/3.4%</b>         |
| emerged adults      | D37 / D34    | 0/86/0%                  |
| emerged adults      | D38 / D35    | 0/234                    |
| emerged adults      | D40 / D37    | 0/143                    |
| emerged adults      | D42 / D39    | 0/126                    |
| emerged adults      | D45 / D42    | 0/102                    |
| emerged adults      | D47 / D44    | 0/22                     |
| emerged adults      | D49 / D46    | 0/19                     |
| emerged adults      | D52 / D49    | 0/11                     |
| emerged adults      | D54 / D51    | 0/2                      |
| emerged adults      | D56 / D53    | 0/5                      |

**S2 Table. *Phlebotomus perniciosus* L4 infected with larval food (one dose at D0)**

| Developmental stage | Sampling day | Nb positive / tested / % |
|---------------------|--------------|--------------------------|
| larvae              | D0           | 0/20                     |
| larvae              | D2           | 0/10                     |
| pupae               | D5           | <b>4/10/40%</b>          |
| emerged adults      | D12          | 0/2                      |
| emerged adults      | D14          | <b>2/11/18.2%</b>        |
| emerged adults      | D16          | <b>1/20/5%</b>           |
| emerged adults      | D19          | 0/37                     |
| emerged adults      | D21          | 0/5                      |
| emerged adults      | D23          | 0/3                      |
| emerged adults      | D26          | 0/1                      |

**S3 Table. *P. perniciosus* females infected by bloodmeal (one dose at D0)**

| <b>Developmental stage</b>                   | <b>Sampling day</b> | <b>Nb tested</b> |
|----------------------------------------------|---------------------|------------------|
| adult females pre-exposure to infected blood |                     | 0/20             |
| adult females non defecated                  | D0                  | <b>9/10/90%</b>  |
| adult females defecated                      | D5                  | <b>2/10/20%</b>  |
| adult females defecated                      | D7                  | <b>2/10/20%</b>  |
| adult females defecated                      | D9                  | <b>1/7/14.3%</b> |

**S4 Table. Susceptibility of females of *P. perniciosus*, *P. orientalis*, *P. papatasi*, *P. sergenti*, *P. argentipes*, *S. schwetzi* and *L. longipalpis* to MASV. neg = negative**

|                       |                           | <b>D2</b>   | <b>D4</b>  | <b>D7</b>  | <b>D9</b>  | <b>D11</b> | <b>D14</b> | <b>D16</b> | <b>D18</b> | <b>D21</b> |
|-----------------------|---------------------------|-------------|------------|------------|------------|------------|------------|------------|------------|------------|
| <i>P. perniciosus</i> | infected/total            | 0/20        | 15/22      | 19/21      | 16/20      | 19/20      | 18/20      | 18/20      | 18/22      |            |
|                       | % infected                | 0           | 68.2       | 90.5       | 80         | 95         | 90         | 90         | 82         |            |
|                       | mean number of RNA copies | <b>neg</b>  | <b>149</b> | <b>600</b> | <b>89</b>  | <b>105</b> | <b>27</b>  | <b>8</b>   | <b>5</b>   |            |
| <i>P. orientalis</i>  | infected/total            | 9/20        | 13/20      | 18/20      | 12/20      | 11/19      | 10/20      | 9/28       | 2/6        |            |
|                       | % infected                | 45          | 65         | 90         | 60         | 57.9       | 50         | 32.1       | 33.3       |            |
|                       | mean number of RNA copies | <b>555</b>  | <b>600</b> | <b>283</b> | <b>125</b> | <b>51</b>  | <b>87</b>  | <b>42</b>  | <b>13</b>  |            |
| <i>P. papatasi</i>    | infected/total            | 3/20        | 16/20      | 14/20      | 12/20      | 12/20      | 10/20      | 12/20      | 9/20       | 3/10       |
|                       | % infected                | 15          | 80         | 70         | 60         | 60         | 50         | 60         | 45         | 30         |
|                       | mean number of RNA copies | <b>1385</b> | <b>139</b> | <b>134</b> | <b>49</b>  | <b>366</b> | <b>75</b>  | <b>53</b>  | <b>443</b> | <b>57</b>  |
| <i>P. sergenti</i>    | infected/total            | 7/20        | 9/20       | 14/20      | 11/20      | 11/20      | 10/20      | 8/13       | 8/17       |            |
|                       | % infected                | 35          | 45         | 70         | 55         | 55         | 50         | 61.5       | 47.1       |            |
|                       | mean number of RNA copies | <b>5714</b> | <b>769</b> | <b>786</b> | <b>874</b> | <b>324</b> | <b>130</b> | <b>38</b>  | <b>64</b>  |            |
| <i>P. argentipes</i>  | infected/total            | 10/20       | 19/20      | 19/20      | 17/19      | 9/19       | 0/8        | 1/8        |            |            |
|                       | % infected                | 50          | 95         | 95         | 89.5       | 47.4       | 0          | 13         |            |            |
|                       | mean number of RNA copies | <b>1051</b> | <b>277</b> | <b>136</b> | <b>56</b>  | <b>16</b>  | <b>neg</b> | <b>5</b>   |            |            |
| <i>S. schwetzi</i>    | infected/total            | 9/20        | 14/20      | 18/20      | 15/20      | 17/20      | 11/20      | 6/13       | 6/10       |            |
|                       | % infected                | 45          | 70         | 90         | 75         | 85         | 55         | 46.2       | 60         |            |
|                       | mean number of RNA copies | <b>230</b>  | <b>95</b>  | <b>95</b>  | <b>84</b>  | <b>35</b>  | <b>16</b>  | <b>5</b>   | <b>15</b>  |            |
| <i>L. longipalpis</i> | infected/total            | 9/20        | 16/10      | 18/20      | 14/20      | 9/20       | 4/20       | 1/13       | 1/7        |            |
|                       | % infected                | 45          | 80         | 90         | 70         | 45         | 20         | 7.7        | 14.3       |            |
|                       | mean number of RNA copies | <b>622</b>  | <b>129</b> | <b>179</b> | <b>34</b>  | <b>12</b>  | <b>24</b>  | <b>5</b>   | <b>3</b>   |            |

**S5 Table. Susceptibility of males of *P. perniciosus*, *P. orientalis*, *P. papatasi*, *P. sergenti*, *P. argentipes*, *S. schwetzi* and *L. longipalpis* to MASV. neg = negative**

|                       |                           | <b>D2</b>  | <b>D4</b>  | <b>D7</b>  | <b>D9</b>  | <b>D11</b> | <b>D14</b> | <b>D16</b> | <b>D18</b> | <b>D21</b> |
|-----------------------|---------------------------|------------|------------|------------|------------|------------|------------|------------|------------|------------|
| <i>P. perniciosus</i> | infected/total            | 0/10       | 14/24      | 21/21      | 20/20      | 20/21      | 17/20      | 10/20      | 8/20       |            |
|                       | % infected                | 0          | 60         | 100        | 100        | 95         | 85         | 50         | 40         |            |
|                       | mean number of RNA copies | <b>neg</b> | <b>94</b>  | <b>418</b> | <b>153</b> | <b>82</b>  | <b>29</b>  | <b>2</b>   | <b>5</b>   |            |
| <i>P. orientalis</i>  | infected/total            | 8/20       | 12/20      | 14/20      | 5/20       | 2/20       | 0/10       |            |            |            |
|                       | % infected                | 40         | 60         | 70         | 25         | 10         | 0          |            |            |            |
|                       | mean number of RNA copies | <b>103</b> | <b>106</b> | <b>112</b> | <b>13</b>  | <b>20</b>  | <b>neg</b> |            |            |            |
| <i>P. papatasi</i>    | infected/total            | 4/20       | 17/20      | 13/20      | 13/20      | 10/20      | 7/20       | 9/20       | 5/18       | 5/10       |
|                       | % infected                | 20         | 85         | 65         | 60         | 50         | 35         | 45         | 27.8       | 50         |
|                       | mean number of RNA copies | <b>162</b> | <b>525</b> | <b>271</b> | <b>81</b>  | <b>36</b>  | <b>37</b>  | <b>78</b>  | <b>273</b> | <b>430</b> |
| <i>P. sergenti</i>    | infected/total            | 5/20       | 10/20      | 10/20      | 14/20      | 10/20      | 13/20      | 7/17       | 0/1        |            |
|                       | % infected                | 25         | 50         | 50         | 70         | 50         | 65         | 41.2       | 0          |            |
|                       | mean number of RNA copies | <b>302</b> | <b>271</b> | <b>433</b> | <b>160</b> | <b>116</b> | <b>66</b>  | <b>86</b>  | <b>neg</b> |            |
| <i>P. argentipes</i>  | infected/total            | 10/20      | 17/20      | 20/20      | 9/15       | 3/5        |            |            |            |            |
|                       | % infected                | 50         | 85         | 100        | 60         | 60         |            |            |            |            |
|                       | mean number of RNA copies | <b>258</b> | <b>110</b> | <b>110</b> | <b>43</b>  | <b>26</b>  |            |            |            |            |
| <i>S. schwetzi</i>    | infected/total            | 8/20       | 20/20      | 16/20      | 10/19      | 13/20      | 13/20      | 7/20       |            |            |
|                       | % infected                | 40         | 100        | 80         | 52.6       | 65         | 65         | 35         |            |            |
|                       | mean number of RNA copies | <b>134</b> | <b>56</b>  | <b>28</b>  | <b>12</b>  | <b>36</b>  | <b>14</b>  | <b>11</b>  |            |            |
| <i>L. longipalpis</i> | infected/total            | 7/20       | 15/20      | 13/20      | 10/20      | 9/20       | 3/20       | 1/11       | 0/10       |            |
|                       | % infected                | 35         | 75         | 65         | 50         | 45         | 15         | 9.1        | 0          |            |
|                       | mean number of RNA copies | <b>320</b> | <b>135</b> | <b>38</b>  | <b>12</b>  | <b>114</b> | <b>46</b>  | <b>4</b>   | <b>neg</b> |            |

**S6 Table. Tissue specificity of MASV in three selected species. Intensity of infection in gut, salivary glands and rest of body in females *P. perniciosus*, *S. schwetzi* and *L. longipalpis*.**

|                       | <b>Viral load</b> | <b>D4</b> | <b>D7</b> | <b>D10</b> |
|-----------------------|-------------------|-----------|-----------|------------|
| <i>P. perniciosus</i> | salivary glands   | 12        | 12        | neg        |
|                       | midgut            | 1007      | 48        | 17         |
|                       | rest of body      | 6354      | 496       | 227        |
| <i>S. schwetzi</i>    | salivary glands   | 11        | 7         | neg        |
|                       | midgut            | 262       | 30        | 32         |
|                       | rest of body      | 1081      | 345       | 412        |
| <i>L. longipalpis</i> | salivary glands   | neg       | neg       | neg        |
|                       | midgut            | 176       | 51        | 11         |
|                       | rest of body      | 1202      | 506       | 71         |
