# Supplementary material for: Experimental Infection of Sand Flies by Massilia Virus and Viral Transmission by Co-Feeding on Sugar Meal
Source: MDPI journal article supplement (doi:10.3390/v11040332), 2019-04-09
Supplement: s1 [file s1]

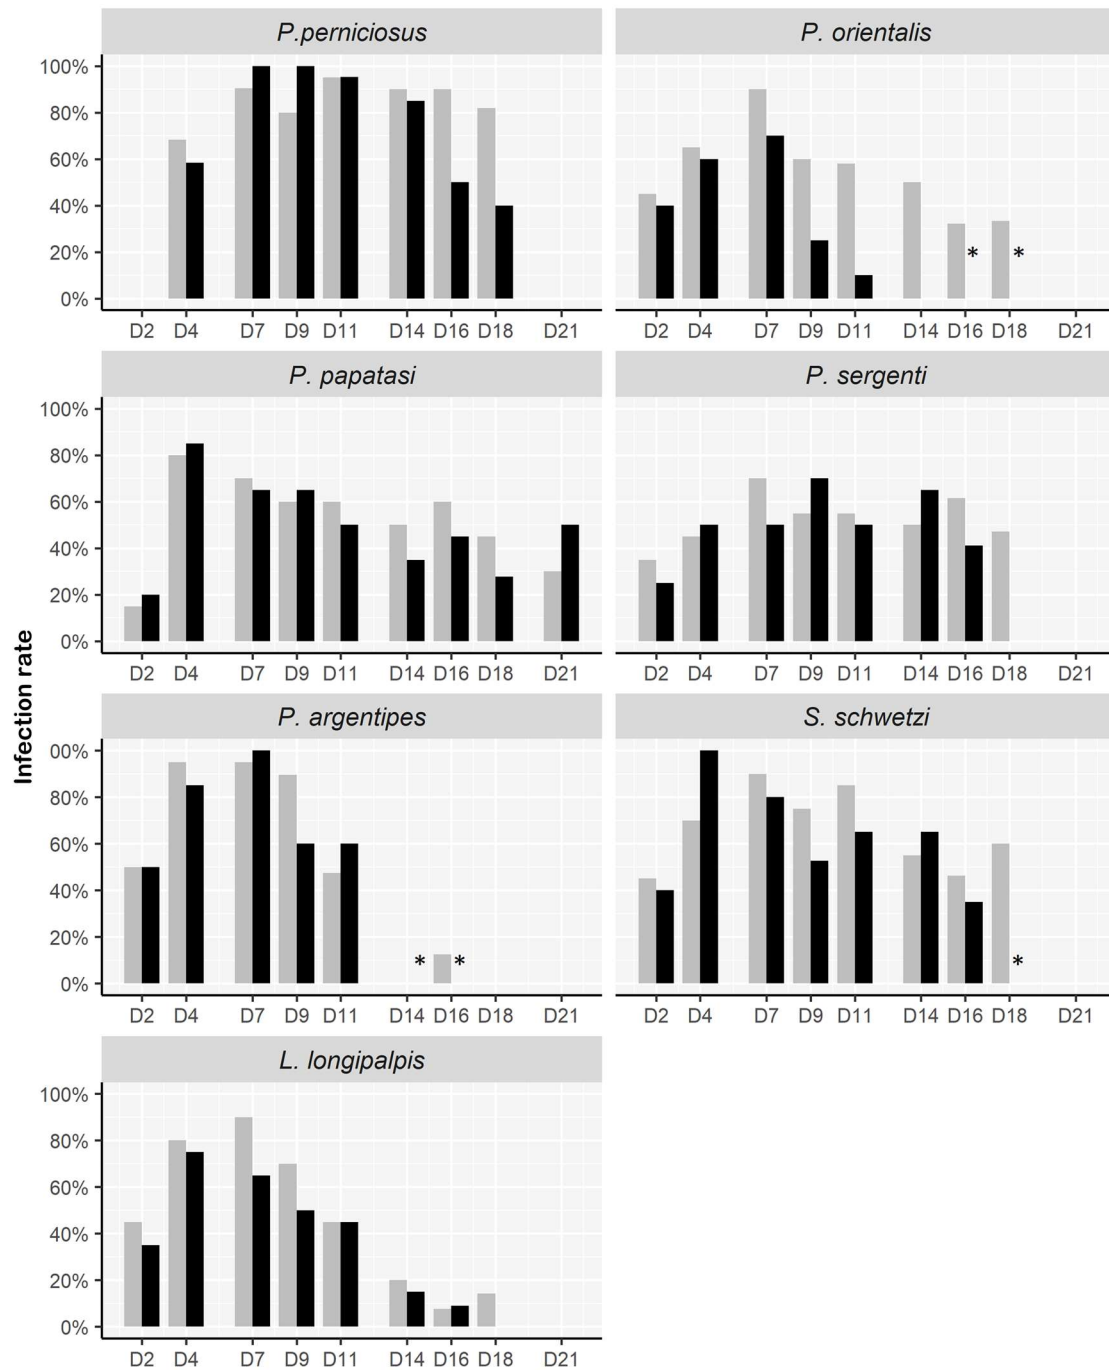

**Figure S1. Susceptibility of females (grey bars) and males (black bars) of seven sand fly species to Massilia virus (MASV).** \* no living males were available by these intervals. *P.*, *Phlebotomus*; *S.*, *Sergentomyia*; *L.*, *Lutzomyia*.
